RESEARCH ARTICLE

# Association of Nitric Oxide Synthase and Matrix Metalloprotease Single Nucleotide Polymorphisms with Preeclampsia and Its Complications

Daniela P. Leonardo<sup>1</sup>, Dulcinéia M. Albuquerque<sup>1</sup>, Carolina Lanaro<sup>1</sup>, Letícia C. Baptista<sup>1</sup>, José G. Cecatti<sup>2</sup>, Fernanda G. Surita<sup>2</sup>, Mary A. Parpinelli<sup>2</sup>, Fernando F. Costa<sup>1</sup>, Carla F. Franco-Penteado<sup>1</sup>, Kleber Y. Fertrin<sup>1,3‡\*</sup>, Maria Laura Costa<sup>2‡</sup>

**1** Hematology and Hemotherapy Center, University of Campinas—UNICAMP, Campinas, São Paulo, Brazil, **2** Department of Obstetrics and Gynaecology, School of Medicine, University of Campinas—UNICAMP, Campinas, São Paulo, Brazil, **3** Department of Clinical Pathology, School of Medicine, University of Campinas—UNICAMP, Campinas, São Paulo, Brazil

‡ Denotes shared last authorship

\* [fertrin@unicamp.br](mailto:fertrin@unicamp.br)

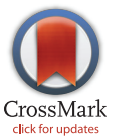

OPEN ACCESS

**Citation:** Leonardo DP, Albuquerque DM, Lanaro C, Baptista LC, Cecatti JG, Surita FG, et al. (2015) Association of Nitric Oxide Synthase and Matrix Metalloprotease Single Nucleotide Polymorphisms with Preeclampsia and Its Complications. PLoS ONE 10(8): e0136693. doi:10.1371/journal.pone.0136693

**Editor:** Carlos Zaragoza, University Francisco de Vitoria School of Medicine, SPAIN

**Received:** April 25, 2015

**Accepted:** August 6, 2015

**Published:** August 28, 2015

**Copyright:** © 2015 Leonardo et al. This is an open access article distributed under the terms of the [Creative Commons Attribution License](https://creativecommons.org/licenses/by/4.0/), which permits unrestricted use, distribution, and reproduction in any medium, provided the original author and source are credited.

**Data Availability Statement:** All relevant data are within the paper.

**Funding:** This study was financially supported by FAEPEX – PRP/UNICAMP (Fundo de Apoio ao Ensino, Pesquisa e Extensão, grant to MLC 699/13), FAPESP (Fundação de Amparo à Pesquisa do Estado de São Paulo, grants to FFC 2014/00984-3 and 2008/57441-0). The funders had no role in study design, data collection and analysis, decision to publish, or preparation of the manuscript.

## Abstract

### Background

Preeclampsia is one of the leading causes of maternal and neonatal morbidity and mortality in the world, but its appearance is still unpredictable and its pathophysiology has not been entirely elucidated. Genetic studies have associated single nucleotide polymorphisms in genes encoding nitric oxide synthase and matrix metalloproteases with preeclampsia, but the results are largely inconclusive across different populations.

### Objectives

To investigate the association of single nucleotide polymorphisms (SNPs) in *NOS3* (G894T, T-786C, and a variable number of tandem repetitions VNTR in intron 4), *MMP2* (C-1306T), and *MMP9* (C-1562T) genes with preeclampsia in patients from Southeastern Brazil.

### Methods

This prospective case-control study enrolled 77 women with preeclampsia and 266 control pregnant women. Clinical data were collected to assess risk factors and the presence of severe complications, such as eclampsia and HELLP (hemolysis, elevated liver enzymes, and low platelets) syndrome.

### Results

We found a significant association between the single nucleotide polymorphism *NOS3* T-786C and preeclampsia, independently from age, height, weight, or the other SNPs

**Competing Interests:** The authors have declared that no competing interests exist.

studied, and no association was found with the other polymorphisms. Age and history of preeclampsia were also identified as risk factors. The presence of at least one polymorphic allele for *NOS3* T-786C was also associated with the occurrence of eclampsia or HELLP syndrome among preeclamptic women.

## Conclusions

Our data support that the *NOS3* T-786C SNP is associated with preeclampsia and the severity of its complications.

## Introduction

Preeclampsia is a multisystem pregnancy-specific disease, with varying clinical features, that affects 2–8% of pregnancies worldwide and is a major cause of maternal morbidity and mortality[1,2], especially in low and middle income countries[3,4], accounting for short and long-term health consequences for mothers and offspring[2,5]. There is a global concern on its rising incidence, mostly due to increasing rates of underlying and predisposing disorders such as chronic hypertension, diabetes and obesity[1,6].

The definition of preeclampsia was recently revised[7] to take into consideration new onset hypertension developing after 20 weeks gestation as well as the coexistence of one or more of the following: proteinuria, other maternal organ dysfunction (renal insufficiency, liver involvement; neurological complications or hematological complications) and/or uteroplacental dysfunction reflected by fetal growth restriction. Severe preeclampsia is considered in the presence of extremely high blood pressure (systolic blood pressure over 160mmHg and diastolic over 110mmHg), symptoms of impending eclampsia, or diagnosis of HELLP (hemolysis, elevated liver enzymes, and low platelets) syndrome. According to time of onset of preeclampsia, early-onset is characterized when the disease presents before 34 weeks of gestation.

Despite extensive research on this topic, the exact causes of this malady remain largely unknown, with strong hypotheses implicating a disturbance of the placental function early in pregnancy that is associated with impaired spiral arteries remodeling and exacerbated inflammatory response[8]. The role of genetics is still not well defined; however, there is clear evidence of the risk factor played by family history, supported by twin studies, segregation and linkage analyses, as well as genome-wide association studies[9–12].

Several studies have identified single nucleotide polymorphisms (SNPs) that may be associated with preeclampsia. The *NOS3* gene is located on the long arm of chromosome 7 (7q35-q36 region) and encodes the enzyme endothelial nitric oxide synthase (eNOS)[13], responsible for the production of nitric oxide (NO). NO is involved in the regulation of blood pressure, blood flow distribution to the organs, inhibition of platelet adhesion and aggregation, and inhibition of some leukocyte functions[14]. Some SNPs including T-786C, G894T (Glu298Asp), and a variable number of tandem repeats (VNTR) in intron 4 have been identified[15–17] and can influence NO production.

The G894T polymorphism has been associated with a reduction in endothelium-dependent vasodilation in pregnancy and with the risk for ischemic heart disease[18,19]. However, in preeclampsia, the results have been conflicting: some studies show association of this polymorphism with the disease, while others disagree[20–25].

The T-786C SNP causes significant reduction of eNOS activity, may be associated with a predisposition to hypertension in general, and is also associated with reduced eNOS mRNA in

the placenta[17,26]. One study has suggested the need for replication of their finding of this polymorphism as a risk factor for preeclampsia[24].

Similarly to eNOS, extracellular matrix metalloproteases (MMPs) are another group of enzymes that can modulate blood flow in the vessels. MMPs induce cleavage of calcitonin gene-related peptide, and of "big endothelin" (ET-1), producing its most active form, ET-1 [1–32], favoring vasoconstriction[27,28]. Increased activity of MMPs seems to play a role in preeclampsia, as plasma levels of MMP-2 have been found to be elevated in patients with preeclampsia[29], so SNPs in genes encoding MMPs have been studied as biomarkers of susceptibility to preeclampsia.

SNPs in the *MMP2* gene have been less studied than *NOS3*, and despite their association with increased levels of MMP-2, SNPs C-1306T and C-735T have not been identified as biomarkers of susceptibility in one population and warrant further studies[30].

SNP C-1562T in the gene encoding MMP-9 has been implicated in an increase in gene expression in individuals carrying the polymorphic allele T[31]. This SNP has been associated with hypertension in the general population[32–34] and with gestational hypertension, but susceptibility to preeclampsia has been controversial across different populations[30,35–38].

We aimed at shedding light on the controversial role of these polymorphisms by performing a case-control study of preeclamptic and normotensive pregnant women. We compared the distribution of genotypes for *NOS3* G894T, T-786C, and VNTR in intron 4, as well as *MMP2* C-1306T and *MMP9* C-1562T, and tested their association with preeclampsia and its major complications.

## Materials and Methods

### Ethics statement

This study was approved by the local Ethics Board of the Hospital da Mulher Prof. Dr. José Aristodemo Pinotti, Centro de Atenção Integral à Saúde da Mulher–CAISM, a public regional reference hospital for Obstetrics and Gynecology in Campinas, Brazil (approval number 502/2010). Written informed consent was obtained from all subjects.

### Patient enrollment

Inclusion criteria for cases were pregnancy between 20 and 40 weeks or post-partum, and preeclampsia as defined by new onset of hypertension with systolic blood pressure (BP) above 140mmHg or diastolic BP above 90mmHg, in association with either proteinuria above 300mg in 24h or a positive urine dipstick test equal to or above 2+ in the absence of urinary infection [39]. Inclusion criteria for controls were pregnancy between 20 and 40 weeks or post-partum and absence of any of the diagnostic criteria for preeclampsia until discharge after delivery, including a negative urine dipstick test or normal 24-hour proteinuria. Exclusion criteria for both groups were multiple gestation, fetal malformations, arterial hypertension, gestational hypertension, diabetes mellitus, autoimmune diseases, thyroid disease, and chronic infectious diseases.

### Genotype determination

Peripheral venous blood samples were collected in tubes containing EDTA and stored at 4 degrees Celsius until the time of processing. All samples were numbered upon enrollment and laboratory personnel were blinded to the diagnostic group allocation until the genotyping phase was finished. Genomic DNA was obtained using phenol-chloroform modified technique [40]. *NOS3* G894T and T-786C, *MMP2* C-1306T, and *MMP9* C-1562T genotyping were

**Table 1. Sequences of primers, annealing temperatures, and enzymes used in PCR-RFLPs and sizes of the fragments obtained.**

| SNP             | Primer sequences                                                                                | Fragment size (bp) | Annealing temperature | Restriction enzyme | Fragments in wild-type homozygotes (bp) | Fragments in polymorphic homozygotes (bp) |
|-----------------|-------------------------------------------------------------------------------------------------|--------------------|-----------------------|--------------------|-----------------------------------------|-------------------------------------------|
| MMP2<br>T-1306C | F-5'-CTTCTAGGCTGGTCCTTACTGA-3'<br>R-5'-CTGAGACCTGAAGAGCTAAAGAGC-3'                              | 193                | 58°C                  | <i>Xsp I</i>       | 186+7                                   | 162+24+7                                  |
| MMP9<br>C-1562T | F-5'-GCCTGGCACATAGTAGGCC-3'<br>R-5'-CTTCTAGCCAGCCGGCATC-3'                                      | 436                | 60°C                  | <i>Nla3</i>        | 381+48+7                                | 246+135+48+7                              |
| NOS3<br>G894T   | F-5'-AAGGCAGGAGACAGTGGATGGA-3'<br>R-CCCAGTCAATCCCTTTGGTGCTCA-3'                                 | 248                | 58°C                  | <i>Mbol</i>        | 248                                     | 158+90                                    |
| NOS3<br>T-786C  | F-5'-CACCCAGGCCACCCCAACT-3'<br>R-5'-GCCGCAGGTCGACAGAGAGACT-3'                                   | 394                | 58°C                  | <i>Msp I</i>       | 394                                     | 352+42                                    |
| NOS3<br>VNTR    | F-5'-CTTACTCTCCACTGCTTTTCAGAG-3'<br>(Martines <i>et al.</i> )<br>R-5'-CGCAGGTCAGCAGAGAGACTAG-3' | 394–448            | 58°C                  | NA                 | NA                                      | NA                                        |

SNP, single nucleotide polymorphism; F, forward; R, reverse; bp, base pairs; VNTR, variable number of tandem repeats, NA, not applicable

doi:10.1371/journal.pone.0136693.t001

performed by PCR-RFLP analysis on a Veriti equipment (Applied Biosystems, CA., USA) followed by 3% agarose gel electrophoresis stained with ethidium bromide visualized under UV light. Table 1 summarizes primers, annealing temperatures, enzymes used, and fragments obtained. Genotypes for the VNTR of intron 4 of NOS3 were determined by FAM-labeled PCR, subsequently diluted at a ratio of 1 to 10 with distilled water, added to a mixture containing formamide (Hi-Di, Applied Biosystems, CA, USA) and standard marker (LIZ 500, Life Technologies), to a final volume of 10uL. The amplified fragments were denatured at 95°C and separated via capillary electrophoresis performed in an automatic DNA Analyzer (ABI 3500 Genetic Analyzer, Applied Biosystems, CA, USA). Automatic sequencing was performed for validation of PCR-RFLP using random samples including all genotypes in all three genes using the Big Dye Terminator Cycle Sequencing Ready Reaction Kit v3.1 (Applied Biosystems, CA, USA) according to the manufacturer's instructions for subsequent electrophoresis in automatic sequencer (ABI 3500 Genetic Analyzer). Sequences obtained were analyzed and compared with public databases (<http://www.ncbi.nlm.nih.gov>).

### Statistical analysis

Clinical and laboratorial data were tabulated in a spreadsheet using Microsoft Excel 2003–2013 (Microsoft, USA) and subsequently exported and analyzed with GraphPad Prism 5.0 software (GraphPad Software, USA). Genotypic and association studies were performed using R software v3.1.2 (The R Foundation for Statistical Computing, USA) with the statistical analysis packages *SNPassoc* and *epicalc*.

### Results

A total of 383 pregnant women were enrolled in this study from March 2011 to July 2014. Forty samples were excluded due to inadequate storage of blood tubes compromising DNA quality or failure to collect minimum clinical data confirming case or control group allocation. There was a total of 77 cases of preeclampsia and 266 control pregnant women. Both groups did not differ significantly in height, pre-gestational weight, body mass index, the percentage of primigravidas, or of women reporting a smoking habit. Preeclamptic women presented at

**Table 2. Clinical characteristics of the study population.**

|                                     | Controls (n = 266) | Cases (n = 77)   | P       |
|-------------------------------------|--------------------|------------------|---------|
| Age, y                              | 24,5 (24,8–28,0)   | 26,4 (25,3–28,0) | 0.0547  |
| Pre-gestational weight, kg          | 64,0 (62,4–65,5)   | 66,3 (63,0–69,6) | 0.2556  |
| Height, m                           | 1,60 (1,60–1,62)   | 1,61 (1,59–1,62) | 0.4529  |
| Body mass index, kg/m <sup>2</sup>  | 24,6 (24,1–25,1)   | 25,3 (24,0–26,6) | 0.1613  |
| Gestational age at admission, weeks | 38,7 (38,4–39,0)   | 35,2 (34,4–36,0) | <0.0001 |
| Neonate weight, g                   | 3138 (3071–3205)   | 2304 (2082–2525) | <0.0001 |
| Neonate Capurro score, weeks        | 38,5 (38,2–38,8)   | 35,3 (34,5–36,1) | <0.0001 |
| Smoking (%)                         | 25/258 (9.4)       | 7/74 (9.1)       | 0.4924  |
| Primigravida (%)                    | 117/266 (44.4)     | 38/77 (49.4)     | 0.1764  |
| Previous preeclampsia (%)           | 15/265 (5.6)       | 28/77 (35.6)     | <0.0001 |
| <b>Type of delivery</b>             |                    |                  |         |
| Vaginal                             | 157                | 13               |         |
| Forceps                             | 11                 | 1                | <0.0001 |
| Cesarean section                    | 87                 | 61               |         |

doi:10.1371/journal.pone.0136693.t002

earlier gestational age for delivery, were more likely to undergo cesarean section, and their offspring was significantly less mature according to Capurro scores, with significantly lower birth weight (Table 2).

Tables 3 and 4 present the data on genotypes according to SNPs and to group allocation, major allele frequencies and Hardy-Weinberg equilibria. We detected a higher frequency of the presence of SNPs in the *NOS3* gene in the group of pregnant women with preeclampsia, but not in the *MMP2* and *MMP9* genes. In regard to the VNTR in intron 4 of the eNOS encoding gene, we noticed a greater diversity of alleles in the control population of pregnant women, with a more frequent appearance of the rare alleles bearing 4 and 6 repetitions (Table 5). Since in all polymorphisms the alleles were in Hardy-Weinberg equilibrium, we assumed that our population had no significant inbreeding or specific migration issues that could affect our estimation of genetic frequencies.

Table 6 shows the results of univariate analysis for risk factors for preeclampsia. The most significant clinical risk factor was previous preeclampsia, while amongst genetic risk factors, only SNPs in the *NOS3* gene were associated with preeclampsia. Subsequent multivariate analysis showed that only *NOS3* T-786C was associated with preeclampsia independently from age, height, or weight.

Among preeclamptic women, we also obtained clinical data whether they had to be admitted to receive magnesium sulfate to treat severe preeclampsia, if they developed HELLP syndrome, or eclampsia. Patients were then assigned a severity score according to the

**Table 3. Major allele frequencies and Hardy-Weinberg tests for the study population.**

| SNP                          | MAF   | HWE P |
|------------------------------|-------|-------|
| <i>NOS3</i> G894T            | 0.861 | 0.65  |
| <i>NOS3</i> T-786C           | 0.907 | 0.51  |
| <i>MMP2</i> C-1306T          | 0.747 | 0.77  |
| <i>MMP9</i> C-1562T          | 0.705 | 0.60  |
| <i>NOS3</i> VNTR in intron 4 | 0.805 | 0.59  |

SNP, single nucleotide polymorphism; MAF, major allele frequency; HWE, Hardy-Weinberg equilibrium

doi:10.1371/journal.pone.0136693.t003

**Table 4. Genotype frequencies of SNPs for the study population.**

|                            | Wild-type homozygote | Heterozygote | Polymorphic homozygote | Not determined |
|----------------------------|----------------------|--------------|------------------------|----------------|
| <b>NOS3894 genotype</b>    | <b>GG</b>            | <b>TG</b>    | <b>TT</b>              | <b>ND</b>      |
| Cases                      | 42 (55%)             | 25 (32%)     | 10 (13%)               | 0 (0%)         |
| Controls                   | 149 (56%)            | 101 (38%)    | 13 (3%)                | 3 (1%)         |
| <b>NOS3-786 genotype</b>   | <b>TT</b>            | <b>CT</b>    | <b>CC</b>              | <b>ND</b>      |
| Cases                      | 36 (47%)             | 29 (38%)     | 12 (16%)               | 0 (0%)         |
| Controls                   | 131 (49%)            | 118 (44%)    | 15 (6%)                | 2 (1%)         |
| <b>MMP2-1306 genotype</b>  | <b>CC</b>            | <b>CT</b>    | <b>TT</b>              | <b>ND</b>      |
| Cases                      | 53 (69%)             | 23 (30%)     | 1 (1%)                 | 0 (0%)         |
| Controls                   | 196 (74%)            | 61 (23%)     | 4 (2%)                 | 5 (2%)         |
| <b>MMP 9-1562 genotype</b> | <b>CC</b>            | <b>CT</b>    | <b>TT</b>              | <b>ND</b>      |
| Cases                      | 60 (78%)             | 11 (14%)     | 1 (1%)                 | 5 (6%)         |
| Controls                   | 217 (82%)            | 43 (16%)     | 3 (1%)                 | 3 (1%)         |

ND, not determined

doi:10.1371/journal.pone.0136693.t004

complications reported: baseline score for preeclampsia was zero, adding 1 point if admission to administer magnesium sulfate was indicated, 10 points if HELLP syndrome was diagnosed, and 100 points if eclampsia ensued, resulting in a score ranging from 0 to a maximum 111 points. We analyzed whether the NOS3 T-786C polymorphism was associated with more severe preeclampsia among the cases. Simple severity score analysis showed that wild-type homozygotes TT for this SNP had a mean score of 1.39, while women with either a CT or CC genotype had a mean score of 14.15. A score above 10 meant that the latter genotype was possibly associated with at least HELLP syndrome. Complementary chi-square analysis of the subgroup of preeclamptic women showed that, in a recessive model, NOS3 T-786C was significantly associated with the occurrence of either HELLP syndrome or eclampsia ( $P < 0.0001$ ). (Fig 1)

## Discussion

In this study, we have explored some clinical and genetic risk factors for preeclampsia in a Brazilian population. We have confirmed that preeclampsia represents a relevant maternal and neonatal comorbidity, with a lower median gestational age upon admission for delivery in women diagnosed with preeclampsia, as well as less mature neonates, lower birth weight and higher percentage of women undergoing cesarean section, which in our hospital is only performed upon medical indication. These results support that this comorbidity precipitates births more prematurely and leads to the development of complications indicating hospitalization of the mother before the usual term.

Our analysis showed that the main clinical risk factor for preeclampsia was personal history of preeclampsia in a previous pregnancy, with an OR of 9.21 (95% confidence interval: 3.22–

**Table 5. Genotype frequencies of NOS3 VNTR in intron 4 for the study population.**

| NOS3 VNTR intron 4 genotype | 4/4     | 5/5       | 4/5      | 4/6    | 5/6    | ND      |
|-----------------------------|---------|-----------|----------|--------|--------|---------|
| Cases                       | 0 (0%)  | 52 (68%)  | 17 (22%) | 1 (1%) | 0 (0%) | 7 (9%)  |
| Controls                    | 13 (5%) | 148 (56%) | 78 (29%) | 2 (1%) | 4 (2%) | 21 (8%) |

VNTR, variable number of tandem repetitions; ND, not determined

doi:10.1371/journal.pone.0136693.t005

**Table 6. Odds ratios for risk factors for preeclampsia.**

| Risk factor                                        | Odds ratio  | 95% CI            |
|----------------------------------------------------|-------------|-------------------|
| <b>Age (years)</b>                                 | <b>1.04</b> | <b>1.01–1.08</b>  |
| Height (cm)                                        | 0.98        | 0.94–1.02         |
| Weight (kg)                                        | 1.00        | 1.00–1.00         |
| Smoking                                            | 0.96        | 0.33–2.40         |
| <b>Previous preeclampsia</b>                       | <b>9.21</b> | <b>3.22–28.26</b> |
| <i>MMP2</i> C-1306T                                | 0.85        | 0.09–7.68         |
| <i>MMP9</i> C-1562T                                | 1.22        | 0.13–11.91        |
| <b>NOS3 G894T (recessive model, TT vs. GT+GG)</b>  | <b>2.87</b> | <b>1.21–6.83</b>  |
| <b>NOS3 T-786C (recessive model, CC vs. TC+TT)</b> | <b>3.06</b> | <b>1.37–6.87</b>  |

CI, confidence interval; values in bold were statistically significant.

doi:10.1371/journal.pone.0136693.t006

28.26), but this obviously only applies to the subset of patients in our study that were not primigravidas. Another limitation of this analysis is that we have excluded other clinical factors that are known to predispose patients to preeclampsia, such as multiple gestation, chronic hypertension, autoimmune diseases, etc. Age was detected as a risk factor, however minor, with an OR of only 1.04, possibly due to a bias introduced by enrolling slightly older women in the preeclampsia group, despite not reaching statistical significance.

Among the genetic risk factors, it was found that only the SNPs affecting eNOS were significantly associated with preeclampsia. These data agree with those from a recent meta-analysis reporting on European populations in which this association was found[41]. We did not detect an association with SNPs in genes encoding MMP-2 and MMP-9. While this confirms previous observations[30,36,38,42], the change in MMP expression already observed by other studies in association with these SNPs may still be relevant[29,37]. MMPs may be more important in the process of invasion of the spiral arteries, which is performed by trophoblasts. Since trophoblasts carry fetal DNA, such SNPs may be more important if present in the fetal DNA rather than in maternal DNA, and new studies should be designed to address this possibility. Even though no particular genotype for the VNTR in intron 4 was associated with preeclampsia in our population, we found a great variety of alleles in our population, with the appearance of the rare allele 6, and a higher frequency of the allele with 4 repetitions amongst controls. It has

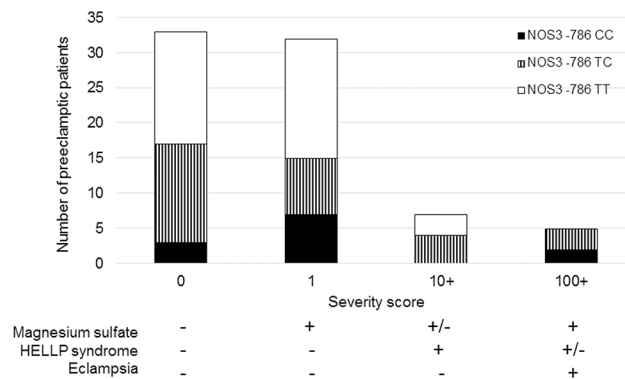

**Fig 1. Number of preeclamptic patients according to severity score and genotype distributions for NOS3 T-786C.**

doi:10.1371/journal.pone.0136693.g001

been recognized that Brazil has a population with wide genetic admixture[43,44] and the presence of these alleles could be explained by this multiethnic background.

In multivariate analysis, the only SNP that remained statistically significant for the risk of preeclampsia after correction for age, height and weight, and that was independent from other polymorphisms, was *NOS3* T-786C, with an OR 3.56 (95% CI: 1:23 to 10:31). The failure to identify the association of the G894T SNP with preeclampsia reported in other studies may derive from differences in sample size, more mixed genetic background, or different inclusion criteria. We have chosen to include all preeclamptic patients regardless of severity, while some studies have used only the most severe spectrum of the disease with blood pressure over 160/100mmHg. A study in a Brazilian population found an association of G894T with preeclampsia occurring after 34 weeks of gestation, but haplotype analyses on time of onset and occurrence of preeclampsia both included the -786C allele[45]. The same group found no association between individual SNPs in the *NOS3* gene with the occurrence of preeclampsia[46], and no differences in nitrite levels across different *NOS3* genotypes in preeclamptic women[47]. These discrepancies within the same region of Brazil may nonetheless reflect some ethnic differences between the populations studied and, differently from reported by one of the other studies[47], we have included patients with HELLP syndrome, and our preeclamptic group did not differ significantly in BMI from the control population, which may have previously influenced the power to detect the association between preeclampsia and this SNP. It has been demonstrated that *NOS3* T-786C polymorphism reduces eNOS mRNA expression in the placenta[48]. Therefore, this SNP may result in enzyme deficiency with reduced bioavailability of NO in the placental tissue, possibly affecting the placentation, trophoblastic invasion of the spiral arteries, and causing ischemia by local vasoconstriction. Thus, placental circulation could be primarily predisposed to an imbalance in favor of a constant reduction of placental blood flow, which can explain the development of placental insufficiency, an important pathophysiological mechanism in the development of preeclampsia. Limitations of this study include not having performed measurement of NO or its metabolites in blood samples to correlate with genotypes and strengthen this hypothesis.

Our data also agree with *NOS3* polymorphism being associated with more severe forms of preeclampsia[49], and in the present study, this SNP was particularly associated with the most severe complications (HELLP syndrome and eclampsia). Taken together, our genetic analysis and previous evidence in the scientific literature support that this SNP may not only be associated, but actually be implicated[50] in the pathogenesis of preeclampsia. NO deficiency can also exacerbate platelet activation, which favors the formation of microthrombi, generating microangiopathic hemolytic anemia and thrombocytopenia, typically found in HELLP syndrome. Intravascular hemolysis results in free hemoglobin that readily reacts with available NO, consuming even more of the already low levels of NO, a vicious circle with decreasing NO bioavailability. Therefore, the association of the *NOS3* polymorphism with preeclampsia and the occurrence of HELLP and eclampsia indicate an important role of NO in the pathophysiology of this disease. Therapeutic strategies that improve NO bioavailability may be useful approaches to be investigated as novel treatment of severe forms and as preventative measure of complications of preeclampsia.

In summary, our data support that *NOS3* T-786C polymorphism is the most important and independent genetic factor in this study associated with the occurrence of preeclampsia in a Brazilian population, and may predispose patients to more severe complications, such as HELLP syndrome and eclampsia.



## Author Contributions

Conceived and designed the experiments: CFF MLC JGC MAP FGS KYF. Performed the experiments: DPL DMA CL LCB. Analyzed the data: FFC DMA CL KYF DPL CFF MLC. Contributed reagents/materials/analysis tools: DMA FFC CL MLC. Wrote the paper: MLC KYF DPL.

## References

1. Steegers EA, von Dadelszen P, Duvekot JJ, Pijnenborg R. Pre-eclampsia. *Lancet*. 2010; 376: 631–644. doi: [10.1016/S0140-6736\(10\)60279-6](https://doi.org/10.1016/S0140-6736(10)60279-6) PMID: [20598363](https://pubmed.ncbi.nlm.nih.gov/20598363/)
2. Von Dadelszen P, Magee LA. Pre-eclampsia: an update. *Curr Hypertens Rep*. 2014; 16: 454. doi: [10.1007/s11906-014-0454-8](https://doi.org/10.1007/s11906-014-0454-8) PMID: [24915961](https://pubmed.ncbi.nlm.nih.gov/24915961/)
3. Souza JP, Gülmezoglu AM, Vogel J, Carroli G, Lumbiganon P, Qureshi Z, et al. Moving beyond essential interventions for reduction of maternal mortality (the WHO Multicountry Survey on Maternal and Newborn Health): a cross-sectional study. *Lancet*. 2013; 381: 1747–1755. doi: [10.1016/S0140-6736\(13\)60686-8](https://doi.org/10.1016/S0140-6736(13)60686-8) PMID: [23683641](https://pubmed.ncbi.nlm.nih.gov/23683641/)
4. Zanette E, Parpinelli MA, Surita FG, Costa ML, Haddad SM, Sousa MH, et al. Maternal near miss and death among women with severe hypertensive disorders: a Brazilian multicenter surveillance study. *Reprod Heal*. 2014; 11: 4. doi: [10.1186/1742-4755-11-4](https://doi.org/10.1186/1742-4755-11-4)
5. Ahmed R, Dunford J, Mehran R, Robson S, Kunadian V. Pre-eclampsia and future cardiovascular risk among women: a review. *J Am Coll Cardiol*. 2014; 63: 1815–1822. doi: [10.1016/j.jacc.2014.02.529](https://doi.org/10.1016/j.jacc.2014.02.529) PMID: [24613324](https://pubmed.ncbi.nlm.nih.gov/24613324/)
6. Creanga AA, Berg CJ, Ko JY, Farr SL, Tong VT, Bruce FC, et al. Maternal mortality and morbidity in the United States: where are we now? *J Womens Heal*. 2014; 23: 3–9. doi: [10.1089/jwh.2013.4617](https://doi.org/10.1089/jwh.2013.4617)
7. Gynecologists AC of O and, Pregnancy TF on H in. Hypertension in pregnancy. Report of the American College of Obstetricians and Gynecologists' Task Force on Hypertension in Pregnancy. *Obs Gynecol*. 2013; 122: 1122–1131. doi: [10.1097/01.AOG.0000437382.03963.88](https://doi.org/10.1097/01.AOG.0000437382.03963.88)
8. Hsu P, Nanan RK. Innate and adaptive immune interactions at the fetal-maternal interface in healthy human pregnancy and pre-eclampsia. *Front Immunol*. 2014; 5: 125. doi: [10.3389/fimmu.2014.00125](https://doi.org/10.3389/fimmu.2014.00125) PMID: [24734032](https://pubmed.ncbi.nlm.nih.gov/24734032/)
9. Cnattingius S, Reilly M, Pawitan Y, Lichtenstein P. Maternal and fetal genetic factors account for most of familial aggregation of preeclampsia: a population-based Swedish cohort study. *Am J Med Genet A*. 2004; 130A: 365–371. doi: [10.1002/ajmg.a.30257](https://doi.org/10.1002/ajmg.a.30257) PMID: [15384082](https://pubmed.ncbi.nlm.nih.gov/15384082/)
10. Fong FM, Sahemey MK, Hamed G, Eytayo R, Yates D, Kuan V, et al. Maternal genotype and severe preeclampsia: a HuGE review. *Am J Epidemiol*. 2014; 180: 335–345. doi: [10.1093/aje/kwu151](https://doi.org/10.1093/aje/kwu151) PMID: [25028703](https://pubmed.ncbi.nlm.nih.gov/25028703/)
11. Haram K, Mortensen JH, Nagy B. Genetic aspects of preeclampsia and the HELLP syndrome. *J Pregnancy*. 2014; 2014: 910751. doi: [10.1155/2014/910751](https://doi.org/10.1155/2014/910751) PMID: [24991435](https://pubmed.ncbi.nlm.nih.gov/24991435/)
12. Abou El Hassan M, Diamandis EP, Karumanchi SA, Shennan AH, Taylor RN. Preeclampsia: An Old Disease with New Tools for Better Diagnosis and Risk Management. *Clin Chem*. 2015; doi: [10.1373/clinchem.2014.230565](https://doi.org/10.1373/clinchem.2014.230565)
13. Marsden PA, Heng HH, Scherer SW, Stewart RJ, Hall A V, Shi XM, et al. Structure and chromosomal localization of the human constitutive endothelial nitric oxide synthase gene. *J Biol Chem*. 1993; 268: 17478–17488. Available: <http://www.ncbi.nlm.nih.gov/pubmed/7688726> PMID: [7688726](https://pubmed.ncbi.nlm.nih.gov/7688726/)
14. Southan GJ, Szabó C. Selective pharmacological inhibition of distinct nitric oxide synthase isoforms. *Biochem Pharmacol*. 1996; 51: 383–394. Available: <http://www.ncbi.nlm.nih.gov/pubmed/8619882> PMID: [8619882](https://pubmed.ncbi.nlm.nih.gov/8619882/)
15. Wang XL, Sim AS, Badenhop RF, McCredie RM, Wilcken DE. A smoking-dependent risk of coronary artery disease associated with a polymorphism of the endothelial nitric oxide synthase gene. *Nat Med*. 1996; 2: 41–45. Available: <http://www.ncbi.nlm.nih.gov/pubmed/8564837> PMID: [8564837](https://pubmed.ncbi.nlm.nih.gov/8564837/)
16. Hingorani AD, Liang CF, Fatibene J, Lyon A, Monteith S, Parsons A, et al. A common variant of the endothelial nitric oxide synthase (Glu298→Asp) is a major risk factor for coronary artery disease in the UK. *Circulation*. 1999; 100: 1515–1520. Available: <http://www.ncbi.nlm.nih.gov/pubmed/10510054> PMID: [10510054](https://pubmed.ncbi.nlm.nih.gov/10510054/)
17. Nakayama M, Yasue H, Yoshimura M, Shimasaki Y, Ogawa H, Kugiyama K, et al. T(-786)→C mutation in the 5'-flanking region of the endothelial nitric oxide synthase gene is associated with myocardial infarction, especially without coronary organic stenosis. *Am J Cardiol*. 2000; 86: 628–634. Available: <http://www.ncbi.nlm.nih.gov/pubmed/10980213> PMID: [10980213](https://pubmed.ncbi.nlm.nih.gov/10980213/)

18. Savvidou MD, Vallance PJ, Nicolaides KH, Hingorani AD. Endothelial nitric oxide synthase gene polymorphism and maternal vascular adaptation to pregnancy. *Hypertension*. 2001; 38: 1289–1293. Available: <http://www.ncbi.nlm.nih.gov/pubmed/11751705> PMID: [11751705](https://pubmed.ncbi.nlm.nih.gov/11751705/)
19. Casas JP, Cavalleri GL, Bautista LE, Smeeth L, Humphries SE, Hingorani AD. Endothelial nitric oxide synthase gene polymorphisms and cardiovascular disease: a HuGE review. *Am J Epidemiol*. 2006; 164: 921–935. doi: [10.1093/aje/kwj302](https://doi.org/10.1093/aje/kwj302) PMID: [17018701](https://pubmed.ncbi.nlm.nih.gov/17018701/)
20. Yoshimura T, Yoshimura M, Tabata A, Shimasaki Y, Nakayama M, Miyamoto Y, et al. Association of the missense Glu298Asp variant of the endothelial nitric oxide synthase gene with severe preeclampsia. *J Soc Gynecol Investig*. 2000; 7: 238–241. Available: <http://www.ncbi.nlm.nih.gov/pubmed/10964023> PMID: [10964023](https://pubmed.ncbi.nlm.nih.gov/10964023/)
21. Kobashi G, Yamada H, Ohta K, Kato E, Ebina Y, Fujimoto S. Endothelial nitric oxide synthase gene (NOS3) variant and hypertension in pregnancy. *Am J Med Genet*. 2001; 103: 241–244. Available: <http://www.ncbi.nlm.nih.gov/pubmed/11745998> PMID: [11745998](https://pubmed.ncbi.nlm.nih.gov/11745998/)
22. Häkli T, Romppanen EL, Hiltunen M, Helisalme S, Punnonen K, Heinonen S. Endothelial nitric oxide synthase polymorphism in preeclampsia. *J Soc Gynecol Investig*. 2003; 10: 154–157. Available: <http://www.ncbi.nlm.nih.gov/pubmed/12699878> PMID: [12699878](https://pubmed.ncbi.nlm.nih.gov/12699878/)
23. Landau R, Xie HG, Dishy V, Wood AJ, Stein CM, Smiley RM. No association of the Asp298 variant of the endothelial nitric oxide synthase gene with preeclampsia. *Am J Hypertens*. 2004; 17: 391–394. doi: [10.1016/j.amjhyper.2004.01.006](https://doi.org/10.1016/j.amjhyper.2004.01.006) PMID: [15110896](https://pubmed.ncbi.nlm.nih.gov/15110896/)
24. Serrano NC, Casas JP, Díaz LA, Páez C, Mesa CM, Cifuentes R, et al. Endothelial NO synthase genotype and risk of preeclampsia: a multicenter case-control study. *Hypertension*. 2004; 44: 702–707. doi: [10.1161/01.HYP.0000143483.66701.ec](https://doi.org/10.1161/01.HYP.0000143483.66701.ec) PMID: [15364897](https://pubmed.ncbi.nlm.nih.gov/15364897/)
25. Yu CK, Casas JP, Savvidou MD, Sahemey MK, Nicolaides KH, Hingorani AD. Endothelial nitric oxide synthase gene polymorphism (Glu298Asp) and development of pre-eclampsia: a case-control study and a meta-analysis. *BMC Pregnancy Childbirth*. 2006; 6: 7. doi: [10.1186/1471-2393-6-7](https://doi.org/10.1186/1471-2393-6-7) PMID: [16542455](https://pubmed.ncbi.nlm.nih.gov/16542455/)
26. Miyamoto Y, Saito Y, Nakayama M, Shimasaki Y, Yoshimura T, Yoshimura M, et al. Replication protein A1 reduces transcription of the endothelial nitric oxide synthase gene containing a -786T→C mutation associated with coronary spastic angina. *Hum Mol Genet*. 2000; 9: 2629–2637. Available: <http://www.ncbi.nlm.nih.gov/pubmed/11063722> PMID: [11063722](https://pubmed.ncbi.nlm.nih.gov/11063722/)
27. Fernandez-Patron C, Radomski MW, Davidge ST. Vascular matrix metalloproteinase-2 cleaves big endothelin-1 yielding a novel vasoconstrictor. *Circ Res*. 1999; 85: 906–911. Available: <http://www.ncbi.nlm.nih.gov/pubmed/10559137> PMID: [10559137](https://pubmed.ncbi.nlm.nih.gov/10559137/)
28. Fernandez-Patron C, Stewart KG, Zhang Y, Koivunen E, Radomski MW, Davidge ST. Vascular matrix metalloproteinase-2-dependent cleavage of calcitonin gene-related peptide promotes vasoconstriction. *Circ Res*. 2000; 87: 670–676. Available: <http://www.ncbi.nlm.nih.gov/pubmed/11029402> PMID: [11029402](https://pubmed.ncbi.nlm.nih.gov/11029402/)
29. Myers JE, Merchant SJ, Macleod M, Mires GJ, Baker PN, Davidge ST. MMP-2 levels are elevated in the plasma of women who subsequently develop preeclampsia. *Hypertens Pregnancy*. 2005; 24: 103–115. doi: [10.1081/PRG-200059836](https://doi.org/10.1081/PRG-200059836) PMID: [16036395](https://pubmed.ncbi.nlm.nih.gov/16036395/)
30. Palei AC, Sandrim VC, Amaral LM, Machado JS, Cavalli RC, Duarte G, et al. Association between matrix metalloproteinase (MMP)-2 polymorphisms and MMP-2 levels in hypertensive disorders of pregnancy. *Exp Mol Pathol*. 2012; 92: 217–221. doi: [10.1016/j.yexmp.2012.01.008](https://doi.org/10.1016/j.yexmp.2012.01.008) PMID: [22327101](https://pubmed.ncbi.nlm.nih.gov/22327101/)
31. Zhang J, Gruber BL, Marchese MJ, Zucker S, Schwartz LB, Kew RR. Mast cell tryptase does not alter matrix metalloproteinase expression in human dermal fibroblasts: further evidence that proteolytically active tryptase is a potent fibrogenic factor. *J Cell Physiol*. 1999; 181: 312–318. doi: [10.1002/\(SICI\)1097-4652\(199911\)181:2<312::AID-JCP13>3.0.CO;2-1](https://doi.org/10.1002/(SICI)1097-4652(199911)181:2<312::AID-JCP13>3.0.CO;2-1) PMID: [10497310](https://pubmed.ncbi.nlm.nih.gov/10497310/)
32. Pöllänen PJ, Karhunen PJ, Mikkelsen J, Laippala P, Perola M, Penttilä A, et al. Coronary artery complicated lesion area is related to functional polymorphism of matrix metalloproteinase 9 gene: an autopsy study. *Arter Thromb Vasc Biol*. 2001; 21: 1446–1450. Available: <http://www.ncbi.nlm.nih.gov/pubmed/11557670>
33. Blankenberg S, Rupprecht HJ, Poirier O, Bickel C, Smieja M, Hafner G, et al. Plasma concentrations and genetic variation of matrix metalloproteinase 9 and prognosis of patients with cardiovascular disease. *Circulation*. 2003; 107: 1579–1585. doi: [10.1161/01.CIR.0000058700.41738.12](https://doi.org/10.1161/01.CIR.0000058700.41738.12) PMID: [12668489](https://pubmed.ncbi.nlm.nih.gov/12668489/)
34. Morgan AR, Zhang B, Tapper W, Collins A, Ye S. Haplotypic analysis of the MMP-9 gene in relation to coronary artery disease. *J Mol Med*. 2003; 81: 321–326. doi: [10.1007/s00109-003-0441-z](https://doi.org/10.1007/s00109-003-0441-z) PMID: [12728308](https://pubmed.ncbi.nlm.nih.gov/12728308/)

35. Fraser R, Walker JJ, Ekbote U V, Martin KL, McShane P, Orsi NM. Interleukin-4–590 (C>T), toll-like receptor-2 +2258 (G>A) and matrix metalloproteinase-9–1562 (C>T) polymorphisms in pre-eclampsia. *BJOG*. 2008; 115: 1052–6; discussion 1056. doi: [10.1111/j.1471-0528.2008.01771.x](https://doi.org/10.1111/j.1471-0528.2008.01771.x) PMID: [18651887](https://pubmed.ncbi.nlm.nih.gov/18651887/)
36. Luizon MR, Palei AC, Sandrim VC. Polymorphisms and haplotypes in candidate genes related to angiogenesis and endothelial dysfunction in preeclampsia. *J Pregnancy*. 2012; 2012: 914704. doi: [10.1155/2012/914704](https://doi.org/10.1155/2012/914704) PMID: [22570788](https://pubmed.ncbi.nlm.nih.gov/22570788/)
37. Palei AC, Sandrim VC, Amaral LM, Machado JS, Cavalli RC, Lacchini R, et al. Matrix metalloproteinase-9 polymorphisms affect plasma MMP-9 levels and antihypertensive therapy responsiveness in hypertensive disorders of pregnancy. *Pharmacogenomics J*. 2012; 12: 489–498. doi: [10.1038/tpj.2011.31](https://doi.org/10.1038/tpj.2011.31) PMID: [21769110](https://pubmed.ncbi.nlm.nih.gov/21769110/)
38. Rahimi Z, Aghaei A, Vaisi-Raygani A. AT2R -1332 G:A polymorphism and its interaction with AT1R 1166 A:C, ACE I/D and MMP-9–1562 C:T polymorphisms: risk factors for susceptibility to preeclampsia. *Gene*. 2014; 538: 176–181. doi: [10.1016/j.gene.2013.12.013](https://doi.org/10.1016/j.gene.2013.12.013) PMID: [24440243](https://pubmed.ncbi.nlm.nih.gov/24440243/)
39. Bulletins—Obstetrics AC on P. ACOG practice bulletin. Diagnosis and management of preeclampsia and eclampsia. Number 33, January 2002. *Obs Gynecol*. 2002; 99: 159–167. Available: <http://www.ncbi.nlm.nih.gov/pubmed/16175681>
40. Davis LG, Dibner MD, Battey JF. *Basic Method in Molecular Biology*. London: Elsevier; 1986.
41. Dai B, Liu T, Zhang B, Zhang X, Wang Z. The polymorphism for endothelial nitric oxide synthase gene, the level of nitric oxide and the risk for pre-eclampsia: a meta-analysis. *Gene*. 2013; 519: 187–193. doi: [10.1016/j.gene.2013.01.004](https://doi.org/10.1016/j.gene.2013.01.004) PMID: [23375994](https://pubmed.ncbi.nlm.nih.gov/23375994/)
42. Palei AC, Sandrim VC, Amaral LM, Machado JS, Cavalli RC, Lacchini R, et al. Effects of matrix metalloproteinase (MMP)-2 polymorphisms on responsiveness to antihypertensive therapy of women with hypertensive disorders of pregnancy. *Basic Clin Pharmacol Toxicol*. 2012; 111: 262–267. doi: [10.1111/j.1742-7843.2012.00905.x](https://doi.org/10.1111/j.1742-7843.2012.00905.x) PMID: [22672240](https://pubmed.ncbi.nlm.nih.gov/22672240/)
43. Bonifaz-Peña V, Contreras A V, Struchiner CJ, Roela RA, Furuya-Mazzotti TK, Chammas R, et al. Exploring the distribution of genetic markers of pharmacogenomics relevance in Brazilian and Mexican populations. *PLoS One*. 2014; 9: e112640. doi: [10.1371/journal.pone.0112640](https://doi.org/10.1371/journal.pone.0112640) PMID: [25419701](https://pubmed.ncbi.nlm.nih.gov/25419701/)
44. Rodrigues de Moura R, Coelho A V, de Queiroz Balbino V, Crovella S, Brandão LA. Meta-analysis of Brazilian genetic admixture and comparison with other Latin America countries. *Am J Hum Biol*. 2015; doi: [10.1002/ajhb.22714](https://doi.org/10.1002/ajhb.22714)
45. Alpoim PN, Gomes KB, Pinheiro M. B, Godoi LC, Jardim LL, Muniz LG, et al. Polymorphisms in endothelial nitric oxide synthase gene in early and late severe preeclampsia. *Nitric Oxide*. 2014; 42: 19–23. doi: [10.1016/j.niox.2014.07.006](https://doi.org/10.1016/j.niox.2014.07.006) PMID: [25106888](https://pubmed.ncbi.nlm.nih.gov/25106888/)
46. Sandrim VC, Palei AC, Cavalli RC, Araújo FM, Ramos ES, Duarte G, et al. eNOS haplotypes associated with gestational hypertension or preeclampsia. *Pharmacogenomics*. 2008; 9: 1467–1473. doi: [10.2217/14622416.9.10.1467](https://doi.org/10.2217/14622416.9.10.1467) PMID: [18855535](https://pubmed.ncbi.nlm.nih.gov/18855535/)
47. Sandrim VC, Palei AC, Sertorio JT, Cavalli RC, Duarte G, Tanus-Santos JE. Effects of eNOS polymorphisms on nitric oxide formation in healthy pregnancy and in pre-eclampsia. *Mol Hum Reprod*. 2010; 16: 506–510. doi: [10.1093/molehr/gaq030](https://doi.org/10.1093/molehr/gaq030) PMID: [20457799](https://pubmed.ncbi.nlm.nih.gov/20457799/)
48. Wang XL, Sim AS, Wang MX, Murrell GA, Trudinger B, Wang J. Genotype dependent and cigarette specific effects on endothelial nitric oxide synthase gene expression and enzyme activity. *FEBS Lett*. 2000; 471: 45–50. Available: <http://www.ncbi.nlm.nih.gov/pubmed/10760510> PMID: [10760510](https://pubmed.ncbi.nlm.nih.gov/10760510/)
49. Seremak-Mrozikiewicz A, Drews K, Barlik M, Sieroszewski P, Grze kowiak E, Mrozikiewicz P. The significance of -786T > C polymorphism of endothelial NO synthase (eNOS) gene in severe preeclampsia. *J Matern Fetal Neonatal Med*. 2011; 24: 432–436. doi: [10.3109/14767058.2010.511329](https://doi.org/10.3109/14767058.2010.511329) PMID: [20822330](https://pubmed.ncbi.nlm.nih.gov/20822330/)
50. MacArthur DG, Manolio TA, Dimmock DP, Rehm HL, Shendure J, Abecasis GR, et al. Guidelines for investigating causality of sequence variants in human disease. *Nature*. 2014; 508: 469–476. doi: [10.1038/nature13127](https://doi.org/10.1038/nature13127) PMID: [24759409](https://pubmed.ncbi.nlm.nih.gov/24759409/)
